# Supplementary material for: Astrocytes influence medulloblastoma phenotypes and CD133 surface expression
Source: PubMed Central journal article supplement (PMC7337293; doi:10.1371/journal.pone.0235852), 2020-07-06

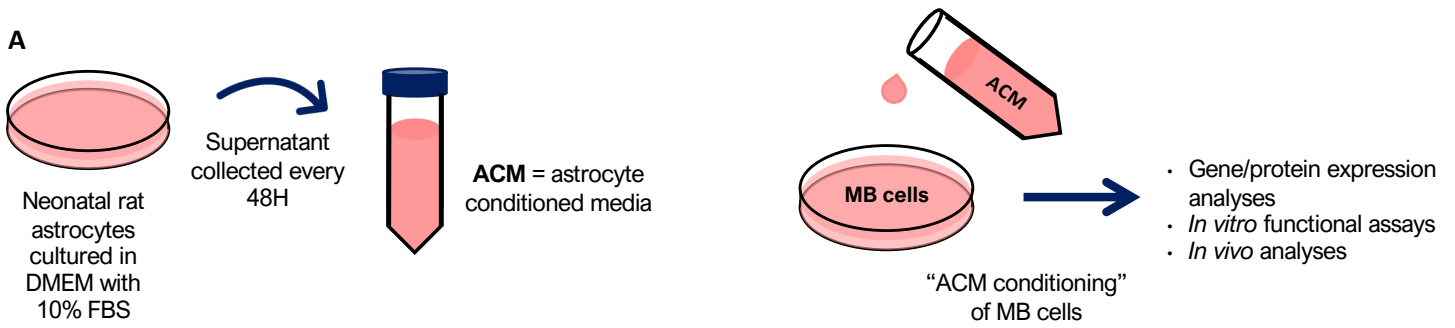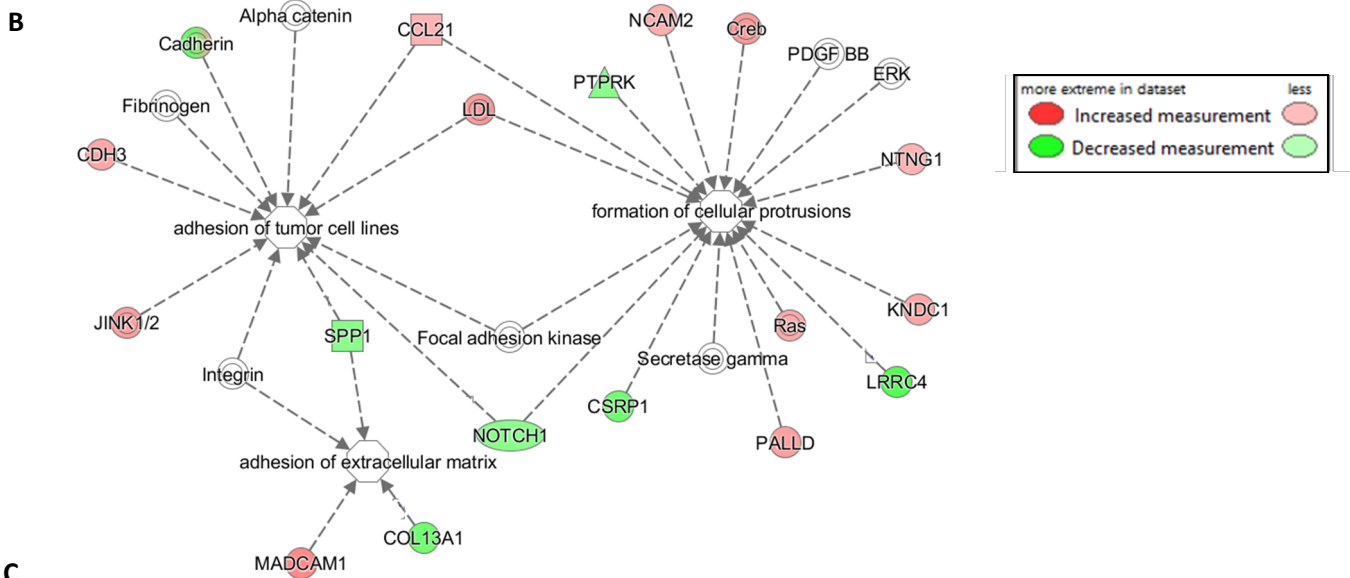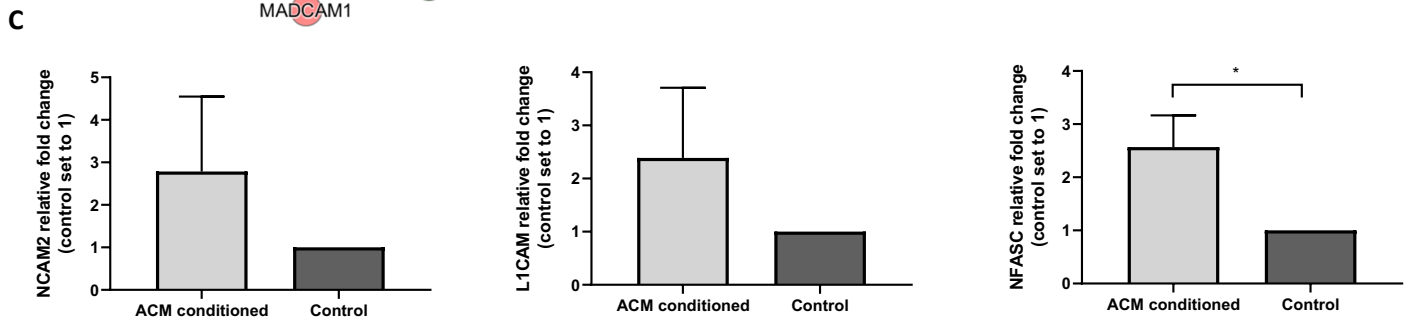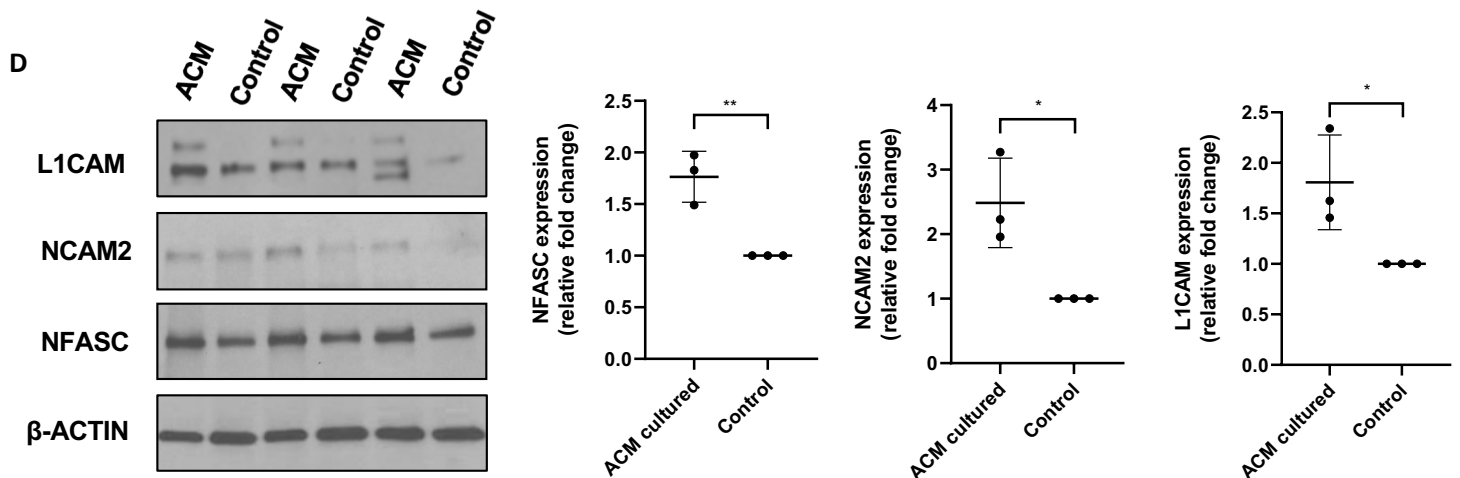

Supplement: pone.0235852.s001.pdf [file pone.0235852.s001.pdf]
