# Supplementary material for: Astrocytes influence medulloblastoma phenotypes and CD133 surface expression
Source: PubMed Central journal article supplement (PMC7337293; doi:10.1371/journal.pone.0235852), 2020-07-06
Supplement: pone.0235852.s004.pdf [file pone.0235852.s004.pdf]

Figure 3E

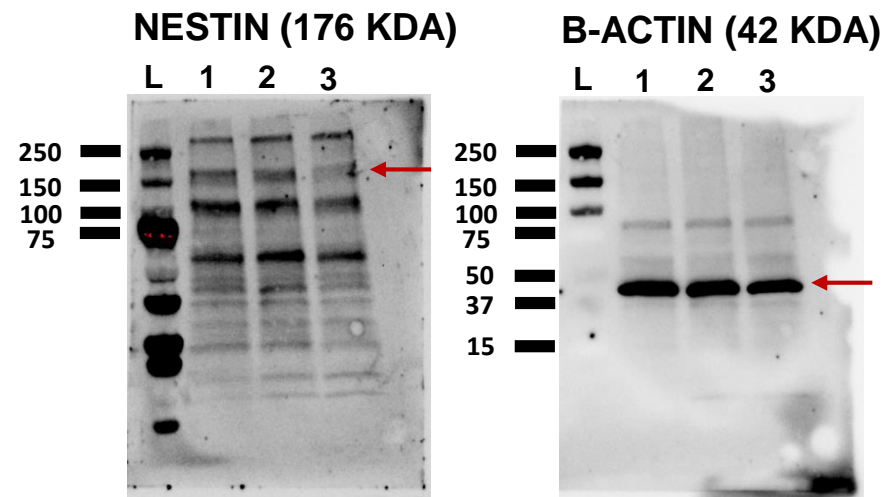

L – ladder  
1 – DMEM:F12 NS 48H  
2 – ACM NS 48H  
3 – DMEM NS 48H

Figure 3E (not pictured)

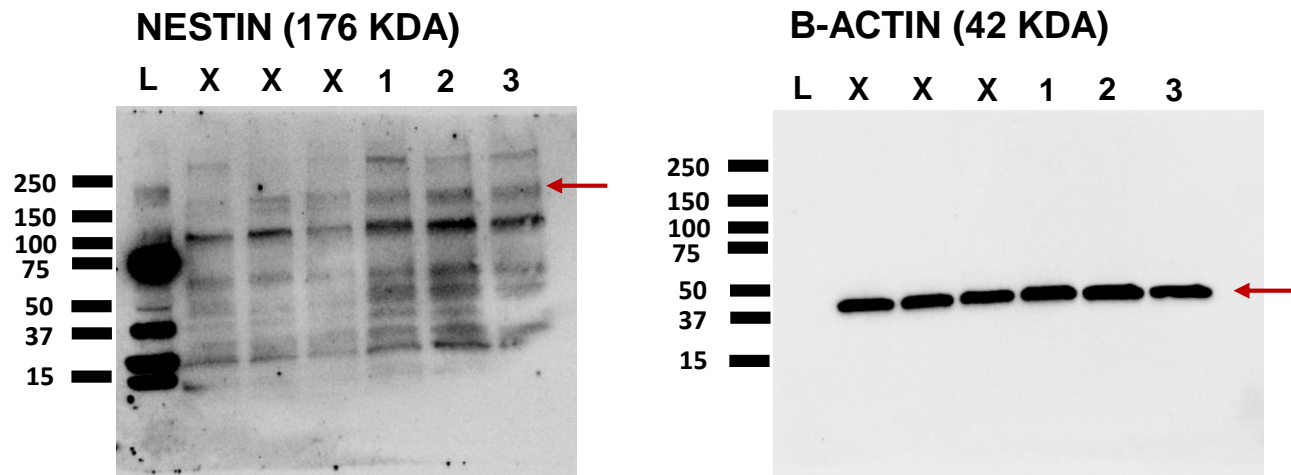

L – ladder  
1 – DMEM NS 48H  
2 – DMEM:F12 NS 48H  
3 – ACM NS 48H

Figure 3E (not pictured)

NESTIN (176 KDA)

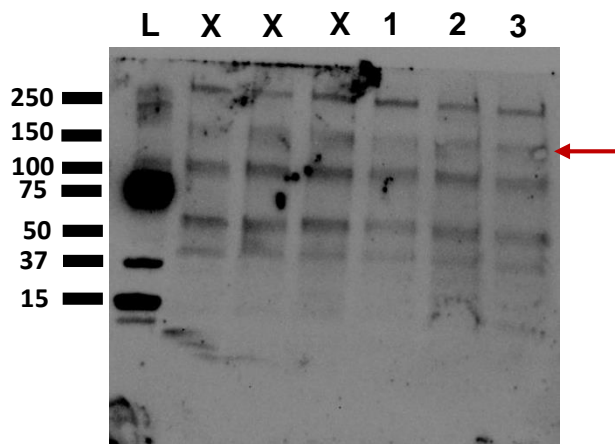

B-ACTIN (42 KDA)

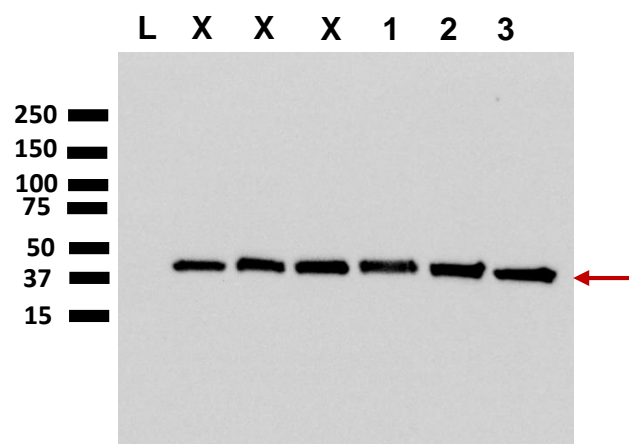

L - ladder

1 - DMEM NS 48H

2 - DMEM:F12 NS 48H

3 - ACM NS 48H

Figure 3F

OCT-4A (45 KDA)

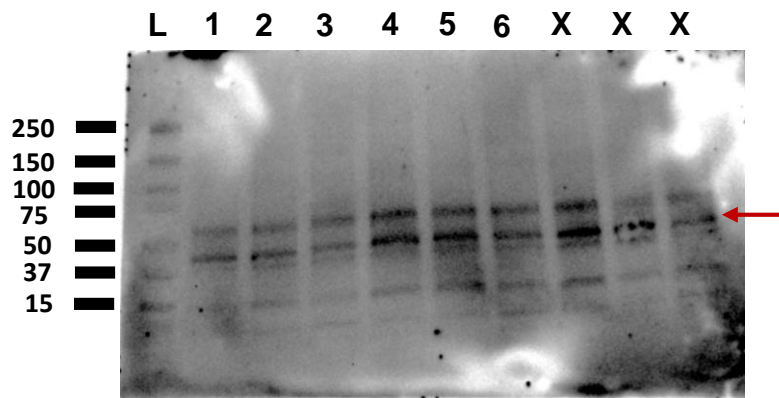

B-ACTIN (42 KDA)

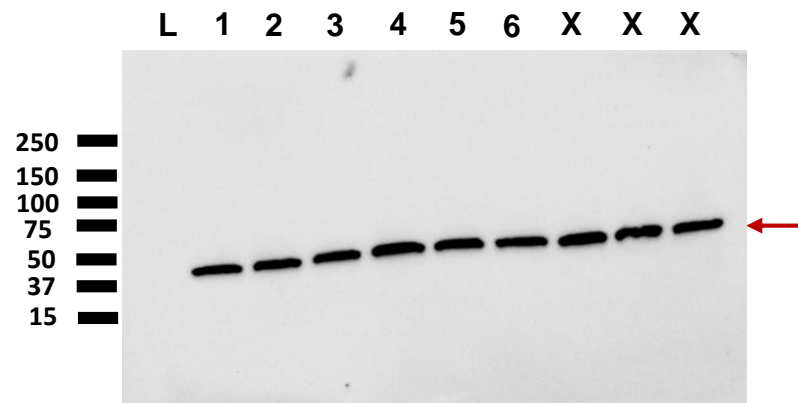

L – ladder

1 – DMEM:F12 NS 48H

2 – ACM NS 48H

3 – DMEM NS 48H

4 – DMEM:F12 NS 48H

5 – ACM NS 48H

6 – DMEM NS 48 H

Figure 3F (not pictured)

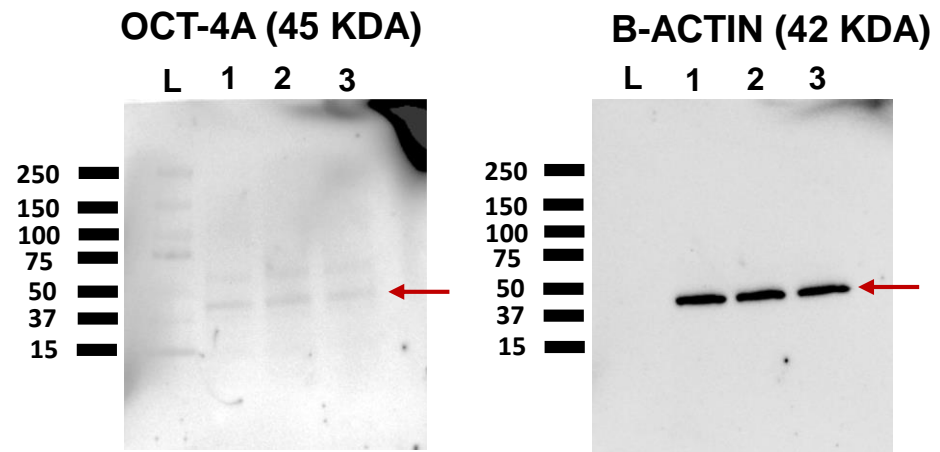

L – ladder  
1 – DMEM:F12 NS 48H  
2 – ACM NS 48H  
3 – DMEM NS 48H

**Figure 3G**

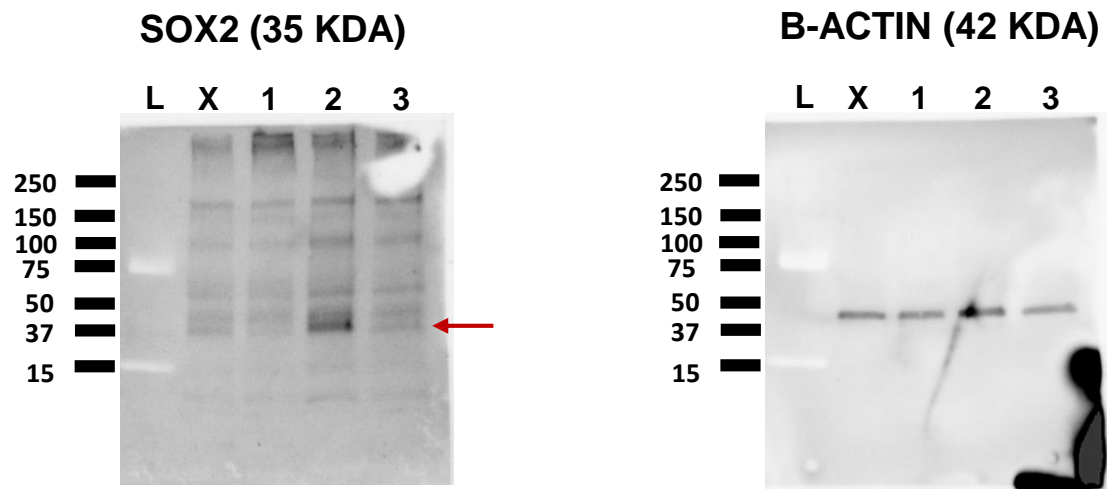

**L – ladder**

**1 – DMEM NS 48H**

**2 – DMEM:F12 NS 48H**

**3 – ACM NS 48H**

Figure 3G (not pictured)

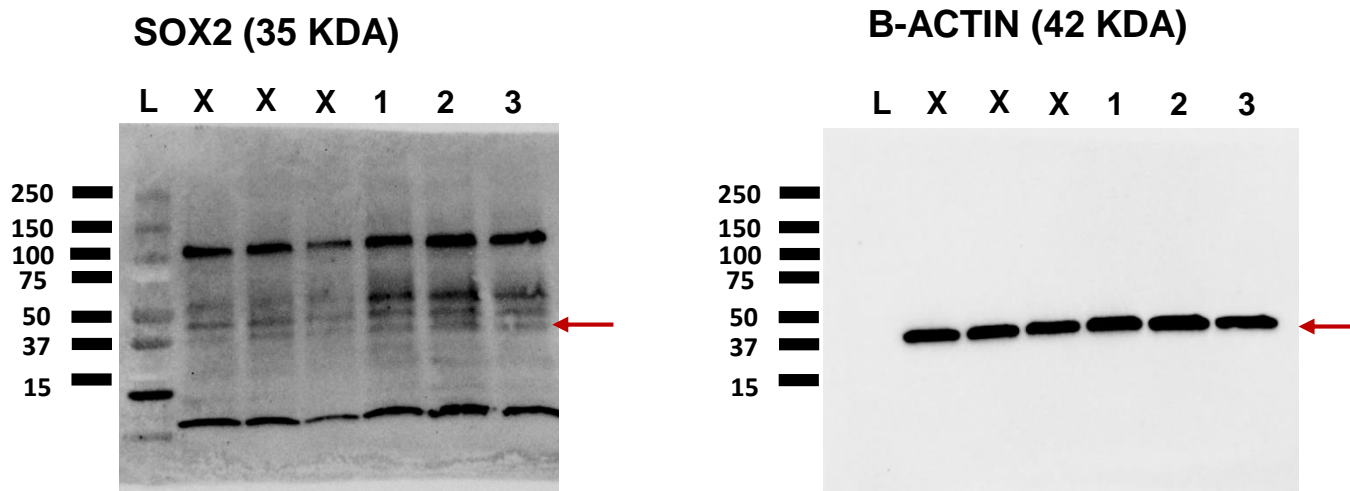

L – ladder  
1 – DMEM NS 48H  
2 – DMEM:F12 NS 48H  
3 – ACM NS 48H

Figure 3G (not pictured)

**SOX2 (35 KDA)**

L X X X 1 2 3

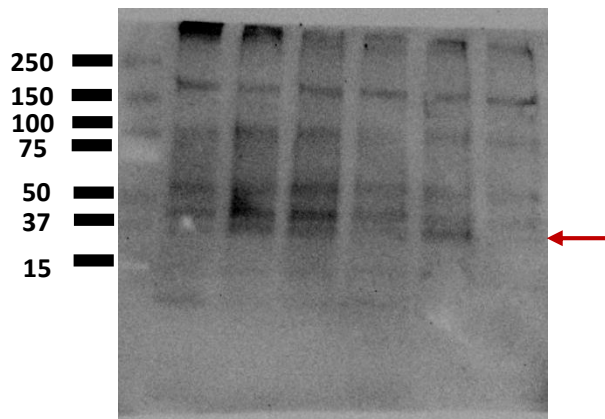

**B-ACTIN (42 KDA)**

L X X X 1 2 3

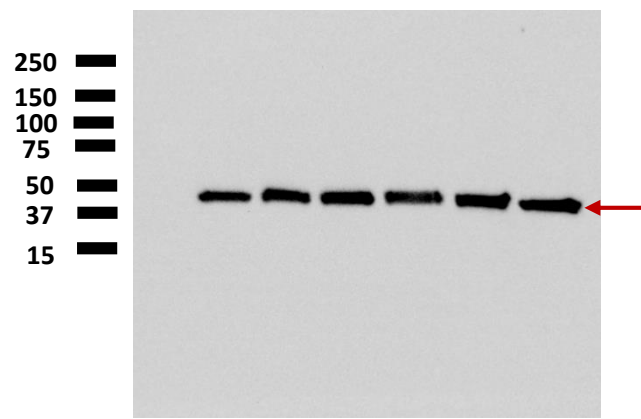

L – ladder

1 – DMEM NS 48H

2 – DMEM:F12 NS 48H

3 – ACM NS 48H



Figure 4A

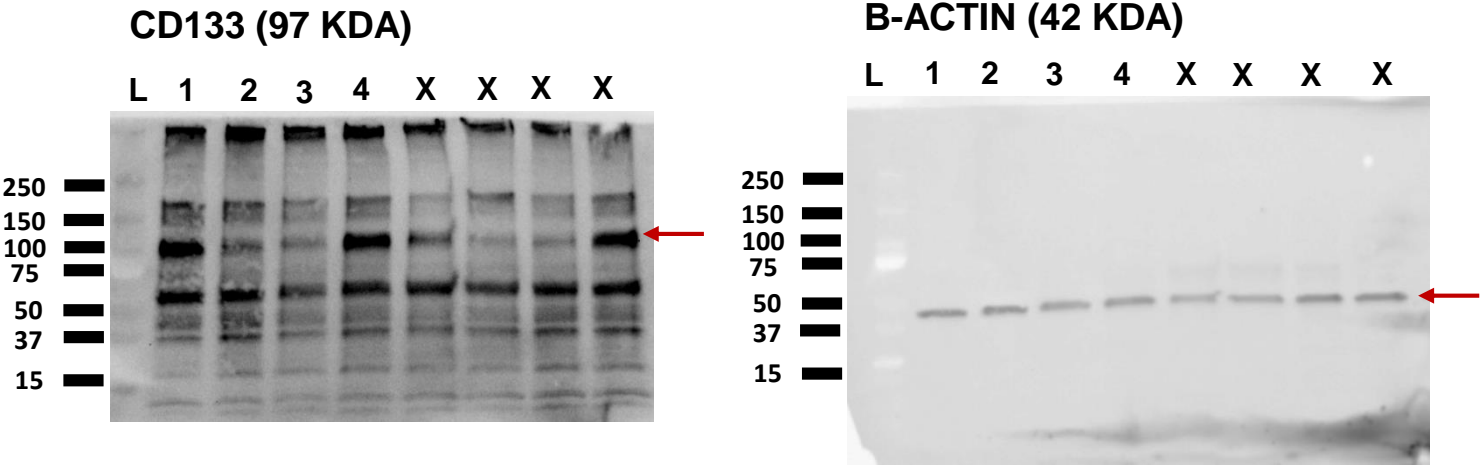

L – ladder  
1 – No transfection  
2 – *siCD133-1* (10nM)  
3 – *siCD133-2* (10nM)  
4 – *Scramble* (10nM)

Figure 4A (not pictured)

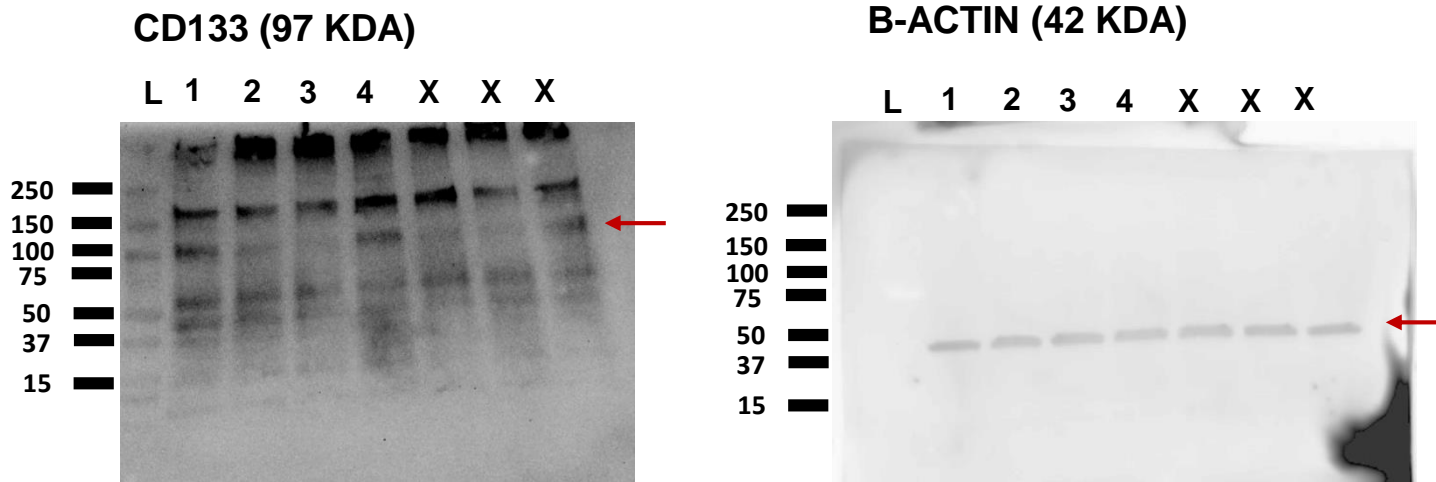

L - ladder  
1 - No transfection  
2 - *siCD133-1* (10nM)  
3 - *siCD133-2* (10nM)  
4 - *Scramble* (10nM)

Figure 4A (not pictured)

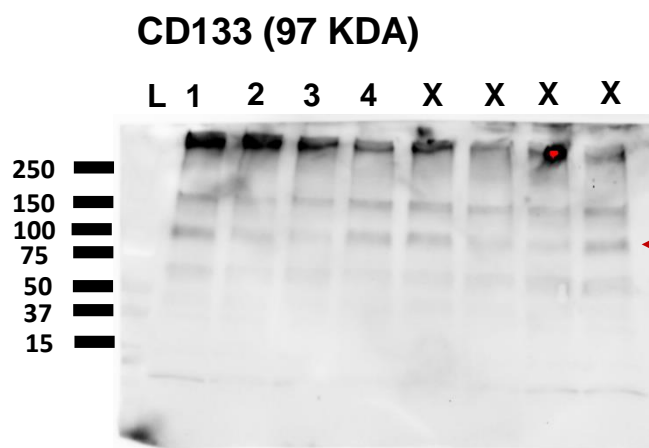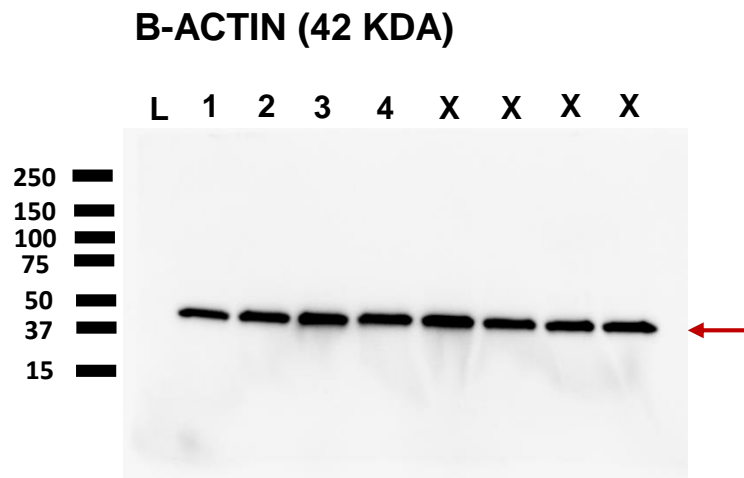

L – ladder  
1 – No transfection  
2 – *siCD133-1* (10nM)  
3 – *siCD133-2* (10nM)  
4 – *Scramble* (10nM)

**Figure S1D**

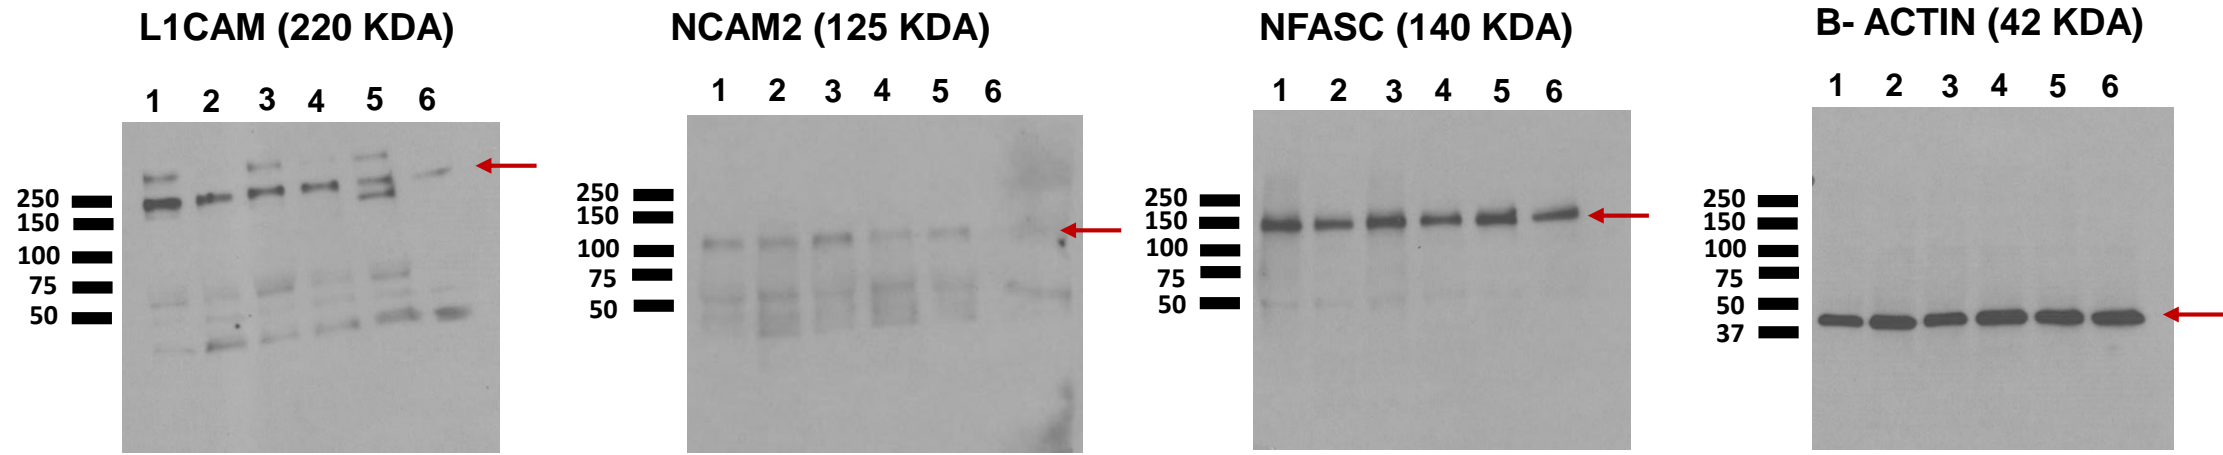

- 1 – ACM cultured 1
- 2 – Control 1
- 3 – ACM cultured 2
- 4 – Control 2
- 5 – ACM cultured 3
- 6 – Control 3
